# Supplementary material
Source: bioRxiv or medRxiv preprint supplement (https://www.biorxiv.org/highwire/filestream/108602/field_highwire_adjunct_files/18/178806-26.pdf)
Supplement: Supplementary file [file 178806-26.pdf]

| <b>Modality name</b>                                           | <b>Type</b>             | <b>Description</b>                                                                                                                                                                     | <b>Number of complete samples (subjects)</b> |
|----------------------------------------------------------------|-------------------------|----------------------------------------------------------------------------------------------------------------------------------------------------------------------------------------|----------------------------------------------|
| T1-weighted image ( <b>T1</b> )                                | Structural              | Measures anatomical features based on contrast between grey and white matter and other tissues.                                                                                        | 8,411- 8,428                                 |
| T2-weighted FLAIR image ( <b>T2 FLAIR</b> )                    | Structural              | Provides a different contrast between tissues (compared with T1), and is sensitive to some pathologies such as white matter lesions.                                                   | 7,705                                        |
| Susceptibility-weighted imaging ( <b>swMRI</b> or <b>SWI</b> ) | Structural              | Can be processed in multiple ways to reflect venous vasculature, microbleeds, aspects of micro-structure (local cellular structure) and biochemical processes such as iron deposition. | 7,778                                        |
| Diffusion-weighted imaging ( <b>dmMRI</b> )                    | Structural connectivity | Measures movement of water molecules within their local tissue environment, allowing for the estimation of long-range structural connectivity and local microstructure.                | 7,532                                        |
| Resting-state functional MRI ( <b>rfMRI</b> )                  | Functional connectivity | Measures dynamic changes in blood oxygenation associated with intrinsic brain activity, to assess functional connectivity via temporal similarities between brain regions.             | 7,916                                        |
| Task functional MRI ( <b>tfMRI</b> )                           | Functional activation   | Functional imaging while subject performs a particular task or experiences a sensory stimulus.                                                                                         | 7,612                                        |

**Supplementary Table 1: Brain Imaging modalities.** An overview of the 6 different brain imaging types used in the UK Biobank study.
